# Supplementary material for: Precise evaluation of batch adsorption kinetics of plant total polyphenols based on a flow-injection online spectrophotometric method
Source: Royal Society of Chemistry journal article supplement (doi:10.1039/d3ay02023a), 2023-12-18
Supplement: d3ay02023a1.pdf [file d3ay02023a1.pdf]

## Supplementary Information

### Precise evaluation of batch adsorption kinetics of plant total polyphenols based on a flow-injection online spectrophotometric method

Gaowei Guo<sup>a</sup>, Turghun Muhammad<sup>a,b,\*</sup>, Zulihumaer Aimaiti<sup>a</sup>, Almire Dolkun<sup>a</sup>, Mei Tian<sup>a</sup>, Qian Zhao<sup>a</sup>,  
Aikebaier Reheman<sup>b</sup>

#### Captions

1. Specification parameters of the resins tested
2. Fiber-optic sensing system
3. Determination of total polyphenol content
4. Resin screening
5. Adsorption/desorption kinetic models of SCTPs on HPD-500 resin
6. Adsorption and desorption kinetic curves of PPTPs on HPD-500 resin
7. Adsorption/desorption kinetic models of PPTPs on HPD-500 resin
8. Reliability analysis

<sup>a</sup>State Key Laboratory of Chemistry and Utilization of Carbon Based Energy Resources, College of Chemistry,  
Xinjiang University, Urumqi, 830017, Xinjiang, PR China.

<sup>b</sup>Fujian Key Laboratory of Toxicant and Drug Toxicology, Medical College, Ningde Normal University, Ningde, Fujian 352100, PR China;

\*Corresponding author: Turghun Muhammad, e-mail: turghunm@xju.edu.cn

Turghun Muhammad: <https://orcid.org/0000-0001-5562-9365>

## 1. Specification parameters of the resins tested

**Table S1** Specification parameters of the resins tested.

| Resins  | Particle size (mm) | Surface area (m <sup>2</sup> /g) | Average pore diameter (nm) | Polarity       |
|---------|--------------------|----------------------------------|----------------------------|----------------|
| D101    | 0.3-1.25           | 550-600                          | 10-11                      | Non-polar      |
| AB-8    | 0.3-1.25           | 480-520                          | 13-14                      | Weak-polar     |
| ADS-17  | 0.3-1.2            | 90-150                           | 25-30                      | Moderate polar |
| HPD-100 | 0.3-1.25           | 650-700                          | 8.5-9                      | Non-polar      |
| HPD-300 | 0.3-1.2            | 800-870                          | 5-5.5                      | Non-polar      |
| HPD-500 | 0.3-1.2            | 500-550                          | 55-75                      | Polar          |
| HPD-600 | 0.3-1.2            | 550-600                          | 8                          | Strong Polar   |
| HPD-750 | 0.3-1.25           | 650-700                          | 8.5-9                      | Moderate polar |
| NKA-9   | 0.3-1.25           | 250-290                          | 15.5-16.5                  | Strong Polar   |
| X-5     | 0.3-1.2            | 500-600                          | 29-30                      | Weak-polar     |

## 2. Fiber-optic sensing system

The fiber-optic sensing detection system consists of a stable and continuous source of spectrum light (190-2500 nm) which was provided by a DH-2000 Deuterium-Halogen Light Source. A USB2000+ Fiber Optic spectrometer and the light source were connected by two UV-grade optical fibers (400  $\mu$ m diameter, 2 m long) to a FIA-Z-SMA-Peek Lensed flow cell with 10 mm of optical path length and 60  $\mu$ L of internal volume (all from Ocean Optics, Dunedin, Florida, USA). First, the light source was turned on for at least 30 min to warm-up. The spectra suite software was activated and the average number of times was adjusted to 10 ms, and the smoothing width was set to 5. Keeping the carrier stream running, the signal intensity level was adjusted to 3500 counts at the corresponding detection wavelength (765 nm), then reference and dark spectra were stored.<sup>1,2</sup> Afterwards, the timing diagram was opened to choose and save the acquisition data mode, detection wavelength and other parameters.

### 3. Determination of total polyphenol content

**Table S2** Comparison of TPCs in several plants determined by the two methods (mg/g, n=6).

| No. | Sample                                  | TPCs determined by conventional method $\pm$ SD | TPCs determined by FIA method $\pm$ SD |
|-----|-----------------------------------------|-------------------------------------------------|----------------------------------------|
| 1   | Alfalfa **                              | 9.484 $\pm$ 0.592                               | 7.302 $\pm$ 0.0098                     |
| 2   | Elaeagnus angustifolia **               | 11.25 $\pm$ 0.564                               | 10.53 $\pm$ 0.340                      |
| 3   | Apple peel **                           | 18.36 $\pm$ 0.917                               | 15.12 $\pm$ 0.197                      |
| 4   | Yellow chrysanthemum <sup>ns</sup>      | 49.18 $\pm$ 2.84                                | 52.33 $\pm$ 0.381                      |
| 5   | Dracocephalum moldavica L <sup>ns</sup> | 49.88 $\pm$ 1.935                               | 52.96 $\pm$ 0.328                      |
| 6   | White chrysanthemum <sup>ns</sup>       | 54.07 $\pm$ 1.045                               | 56.67 $\pm$ 0.263                      |
| 7   | Dried mulberry <sup>ns</sup>            | 60.01 $\pm$ 2.547                               | 62.87 $\pm$ 0.275                      |
| 8   | Black lycium barbarum **                | 73.37 $\pm$ 3.525                               | 70.28 $\pm$ 0.148                      |
| 9   | Snow chrysanthemum **                   | 162.3 $\pm$ 4.112                               | 152.6 $\pm$ 0.374                      |
| 10  | Pomegranate peel **                     | 224.9 $\pm$ 15.3                                | 222.3 $\pm$ 0.374                      |

**Note:** P > 0.05 for <sup>ns</sup>, no significant difference. P  $\leq$  0.01 for \*\*, extremely significant difference.

#### 4. Resin screening

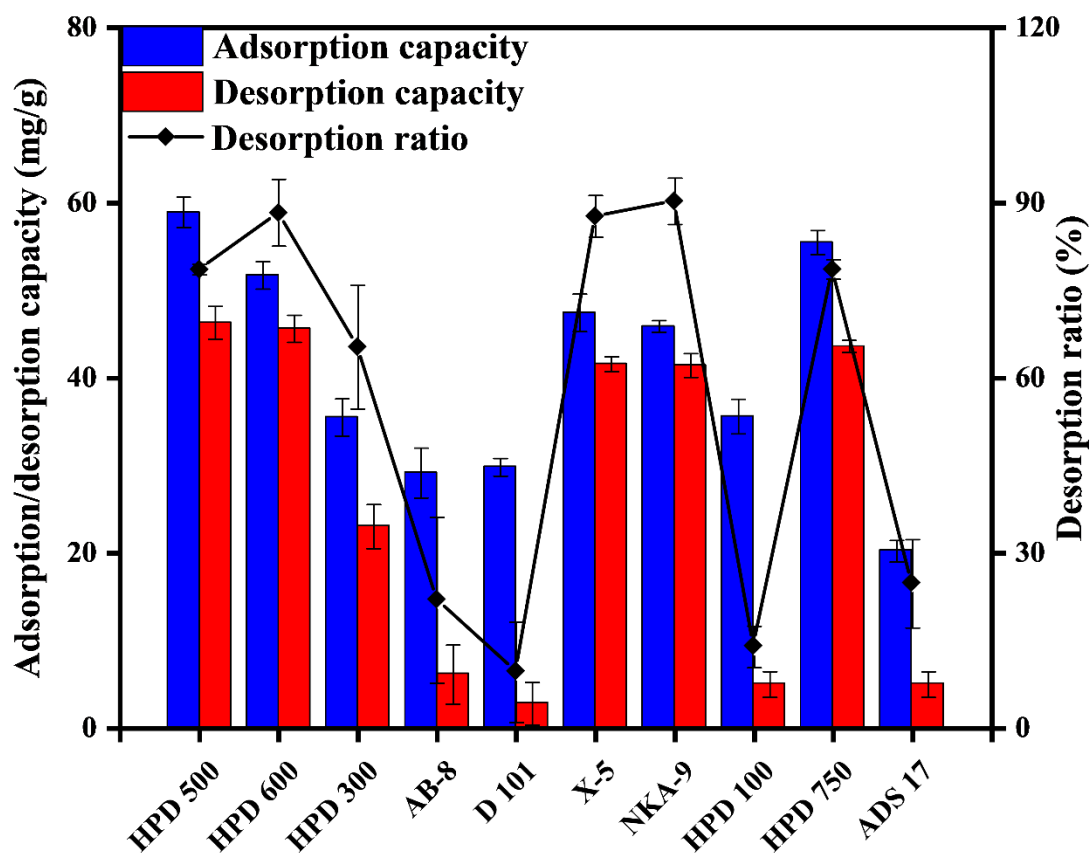

Fig. S1 Adsorption/desorption capacities and desorption ratio of PPTPs on different resins. (Initial concentration/volume of PPTP extract: 161.9 mg/L 200 mL, adsorption solvent: deionized water, desorption solvent: 60% ethanol 100 mL).

## 5. Adsorption/desorption kinetic models of SCTPs on HPD-500 resin

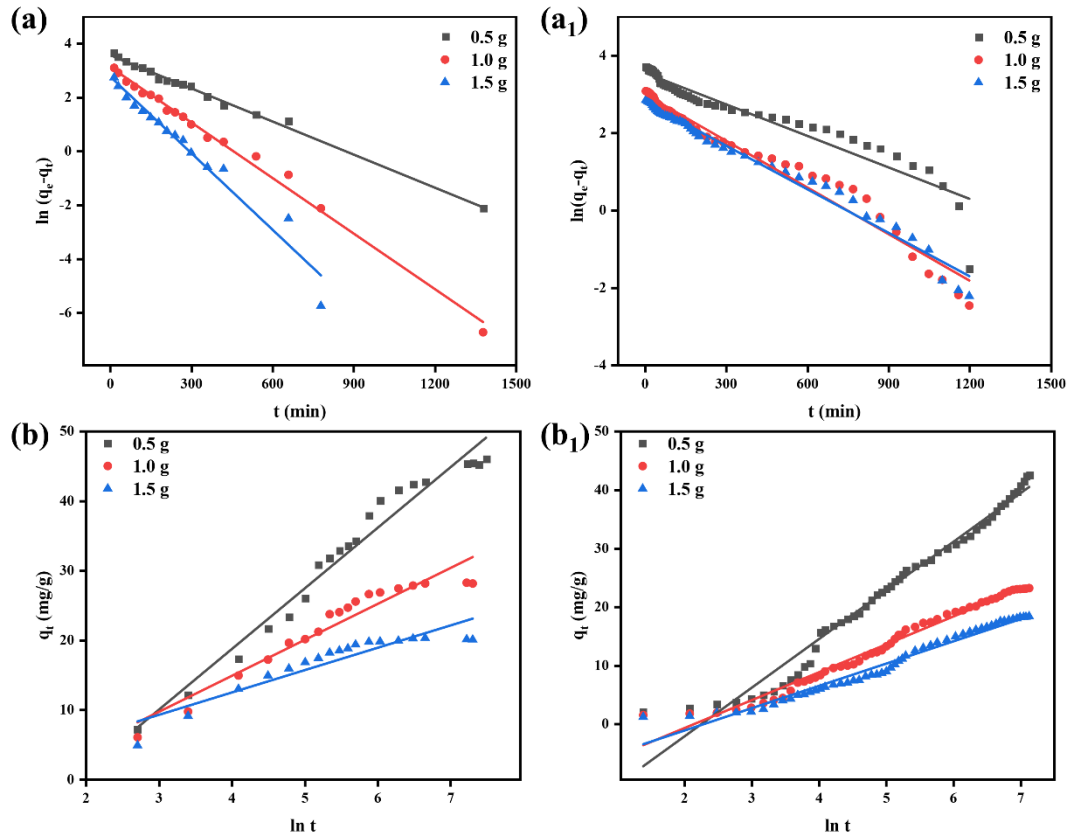

**Fig. S2** Linear fitting of the adsorption kinetics of SCTPs on HPD-500 resin: (a-a<sub>1</sub>). PFO model;

(b-b<sub>1</sub>). Elovich model.

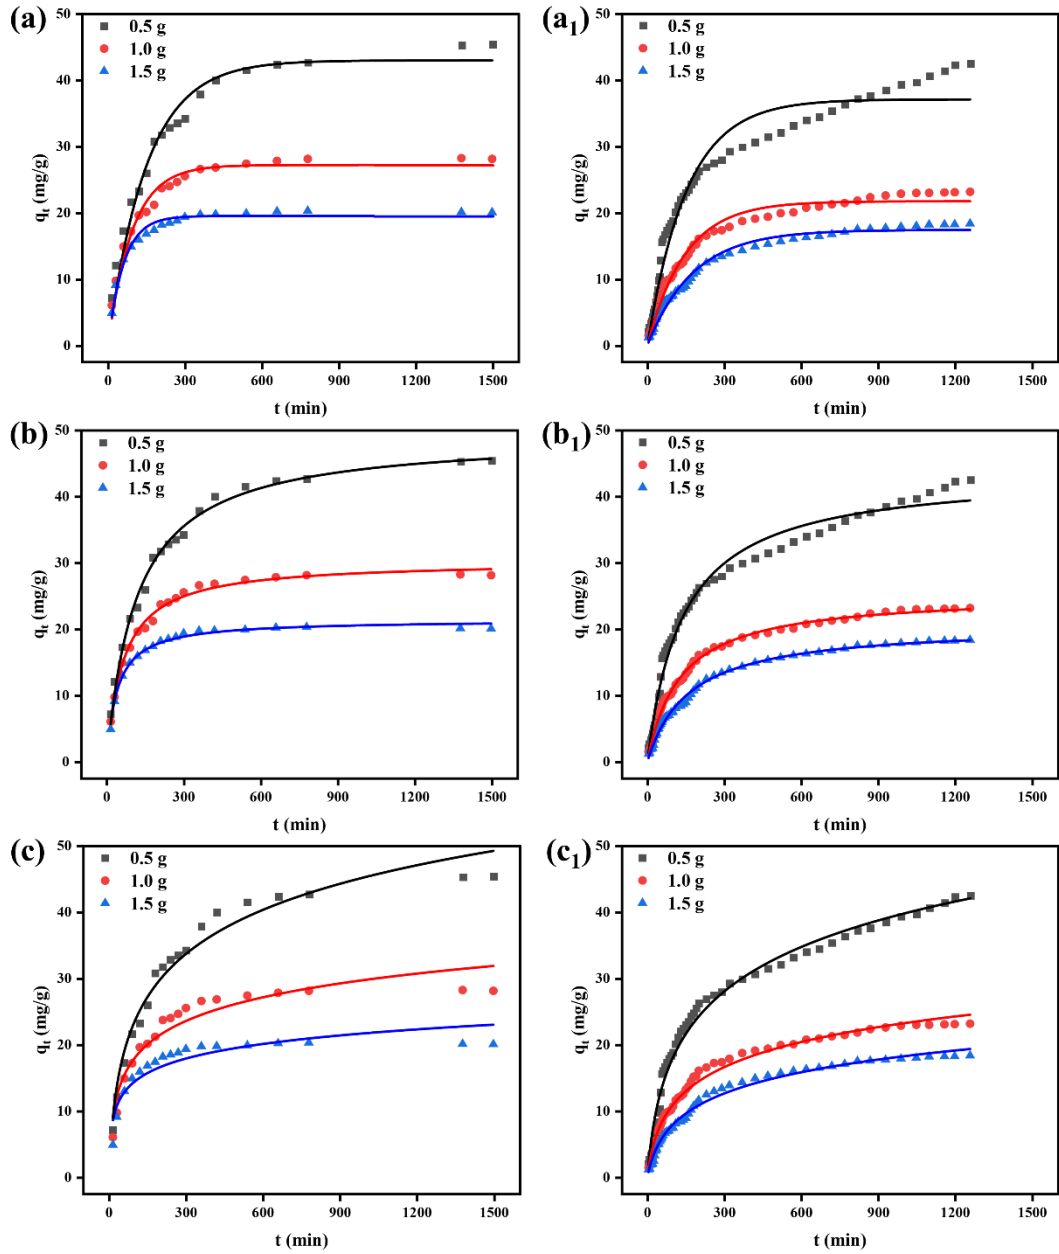

**Fig. S3** Nonlinear fitting of the adsorption kinetics of SCTPs on HPD-500 resin: (a-a<sub>1</sub>). PFO model; (b-b<sub>1</sub>). PSO model; (c-c<sub>1</sub>). Elovich model.

**Table S3** Nonlinear fitting parameters of adsorption kinetic models for SCTPs on HPD-500 resin.

| Detection methods | Adsorbent (g) | $q_{exp}$ (mg/g) | PFO              |                           |        | PSO              |                                   |        |
|-------------------|---------------|------------------|------------------|---------------------------|--------|------------------|-----------------------------------|--------|
|                   |               |                  | $q_{cal}$ (mg/g) | $k_1 \times 10^2$ (1/min) | $R^2$  | $q_{cal}$ (mg/g) | $k_2 \times 10^{-3}$ [g/(mg·min)] | $R^2$  |
| conventional      | 0.5           | 46.01            | 43.01            | 0.662                     | 0.9641 | 49.04            | 1.776                             | 0.9916 |
|                   | 1.0           | 28.12            | 27.20            | 1.0063                    | 0.9623 | 30.28            | 5.119                             | 0.9911 |
|                   | 1.5           | 20.04            | 19.50            | 1.639                     | 0.9676 | 21.38            | 11.5                              | 0.9905 |
| FIA               | 0.5           | 42.53            | 37.13            | 0.648                     | 0.9607 | 43.76            | 1.64                              | 0.9844 |
|                   | 1.0           | 23.17            | 21.72            | 0.679                     | 0.9804 | 25.31            | 3.08                              | 0.9957 |
|                   | 1.5           | 18.34            | 17.39            | 0.558                     | 0.9821 | 20.66            | 2.98                              | 0.9946 |

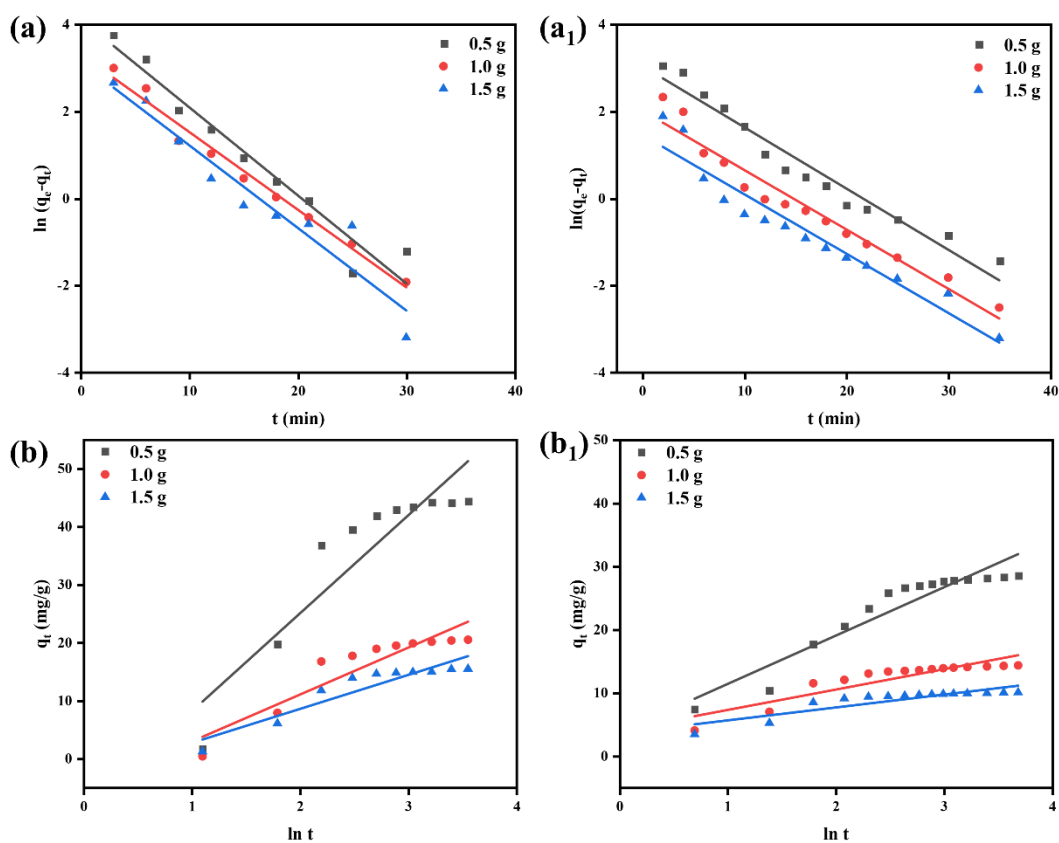

**Fig. S4** Linear fitting of the desorption kinetics of SCTPs on HPD-500 resin: (a-a<sub>1</sub>). PFO model; (b-b<sub>1</sub>). Elovich model.

**Table S4** Linear fitting parameters of desorption kinetic models for SCTPs on HPD-500 resin.

| Detection methods | Adsorbent (g) | $q_{\text{exp}}$ (mg/g) | PFO                     |                         |        | PSO                     |                                   |        |
|-------------------|---------------|-------------------------|-------------------------|-------------------------|--------|-------------------------|-----------------------------------|--------|
|                   |               |                         | $q_{\text{cal}}$ (mg/g) | $k_1 \times 10$ (1/min) | $R^2$  | $q_{\text{cal}}$ (mg/g) | $k_2 \times 10^{-3}$ [g/(mg·min)] | $R^2$  |
| conventional      | 0.5           | 44.38                   | 61.44                   | 2.026                   | 0.9413 | 40.50                   | 0.3556                            | 0.9817 |
|                   | 1.0           | 20.51                   | 27.41                   | 1.787                   | 0.9801 | 18.94                   | 8.405                             | 0.9843 |
|                   | 1.5           | 15.46                   | 22.61                   | 1.901                   | 0.9127 | 14.32                   | 10.97                             | 0.9804 |
| FIA               | 0.5           | 28.56                   | 21.01                   | 1.410                   | 0.9484 | 33.44                   | 5.74                              | 0.9813 |
|                   | 1.0           | 14.33                   | 7.514                   | 1.367                   | 0.9474 | 15.81                   | 19.8                              | 0.9900 |
|                   | 1.5           | 10.04                   | 4.297                   | 1.366                   | 0.9233 | 10.83                   | 37.8                              | 0.9932 |

**Table S5** IPD desorption kinetic model parameters of SCTPs on HPD-500 resin.

| Detection methods | Adsorbent (g) | $K_{\text{id1}}$              | $R^2$  | $K_{\text{id2}}$              | $R^2$  | $K_{\text{id3}}$              | $R^2$  |
|-------------------|---------------|-------------------------------|--------|-------------------------------|--------|-------------------------------|--------|
|                   |               | [mg/(mL·min <sup>1/2</sup> )] |        | [mg/(mL·min <sup>1/2</sup> )] |        | [mg/(mL·min <sup>1/2</sup> )] |        |
| conventional      | 0.5           | 27.57                         | 0.9930 | 3.498                         | 0.8929 | 0.1863                        | 0.8034 |
|                   | 1.0           | 12.80                         | 0.9712 | 1.897                         | 0.9256 | 0.3859                        | 0.9897 |
|                   | 1.5           | 8.258                         | 0.9704 | 0.8824                        | 0.9932 | 0.5844                        | 0.8480 |
| FIA               | 0.5           | 9.677                         | 0.8059 | 6.833                         | 0.9533 | 0.6312                        | 0.8957 |
|                   | 1.0           | 7.118                         | 0.9247 | 1.514                         | 0.7919 | 0.2997                        | 0.9125 |
|                   | 1.5           | 4.797                         | 0.8873 | 0.4664                        | 0.8909 | 0.1603                        | 0.9507 |



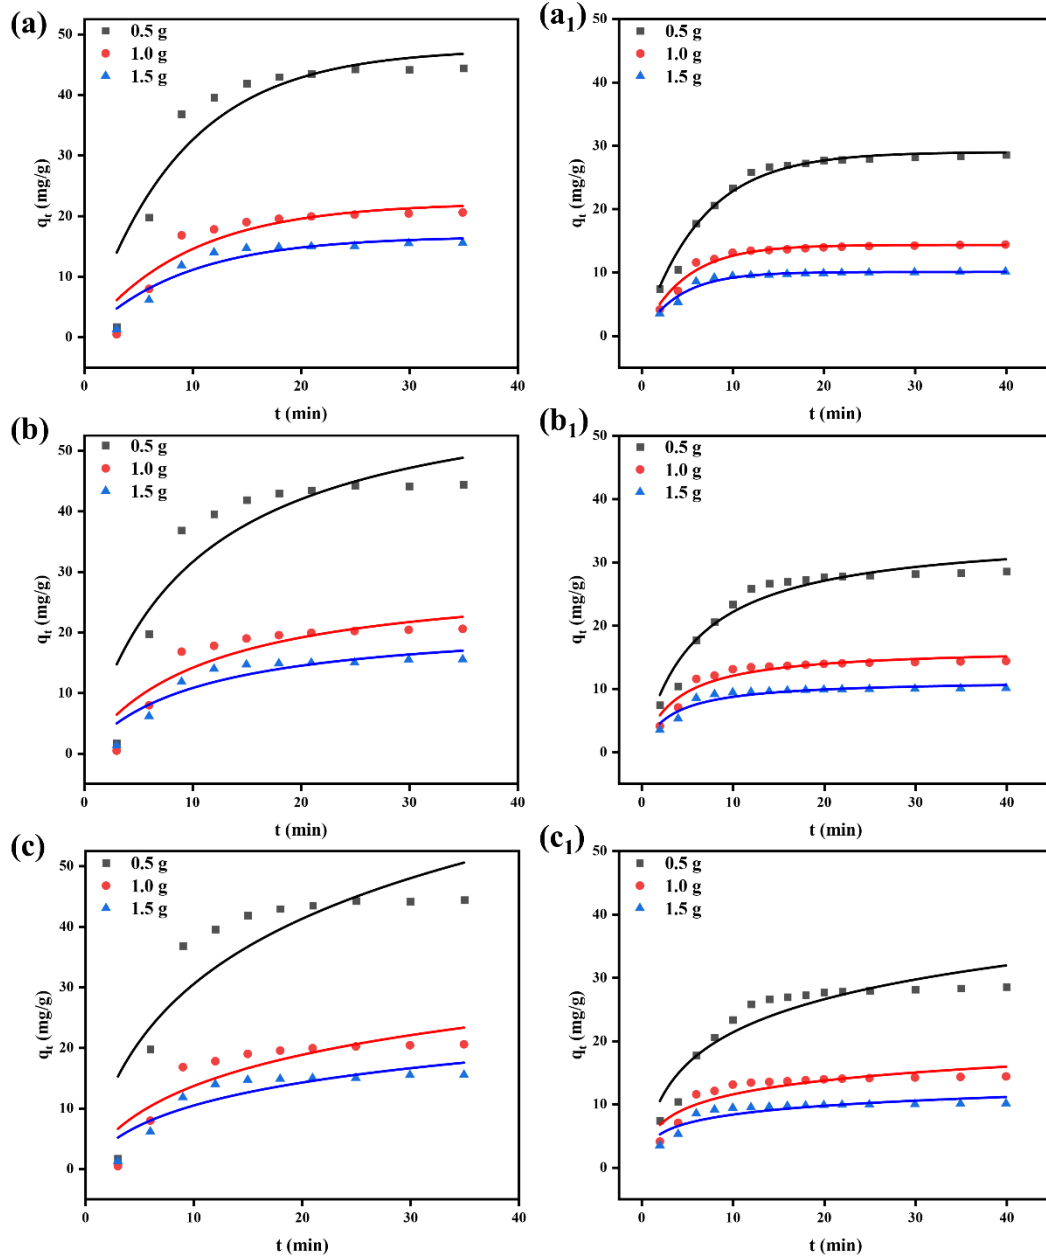

**Fig. S5** Nonlinear fitting of the desorption kinetics of SCTPs on HPD-500 resin: (a-a<sub>1</sub>). PFO model; (b-b<sub>1</sub>). PSO model; (c-c<sub>1</sub>). Elovich model.

**Table S6** Nonlinear fitting parameters of desorption kinetic models for SCTPs on HPD-500 resin.

| Detection methods | Adsorbent (g) | $q_{\text{exp}}$ (mg/g) | PFO                     |                         |        | PSO                     |                                |        |
|-------------------|---------------|-------------------------|-------------------------|-------------------------|--------|-------------------------|--------------------------------|--------|
|                   |               |                         | $q_{\text{cal}}$ (mg/g) | $k_1 \times 10$ (1/min) | $R^2$  | $q_{\text{cal}}$ (mg/g) | $k_2 \times 10^2$ [g/(mg·min)] | $R^2$  |
| conventional      | 0.5           | 44.38                   | 47.60                   | 1.147                   | 0.8517 | 62.51                   | 0.163                          | 0.8058 |
|                   | 1.0           | 20.51                   | 22.12                   | 1.060                   | 0.8456 | 29.60                   | 0.306                          | 0.8062 |
|                   | 1.5           | 15.46                   | 16.58                   | 1.091                   | 0.8733 | 21.96                   | 0.434                          | 0.8309 |
| FIA               | 0.5           | 28.56                   | 28.96                   | 1.536                   | 0.9778 | 34.83                   | 0.497                          | 0.9353 |
|                   | 1.0           | 14.33                   | 14.26                   | 2.116                   | 0.9623 | 16.48                   | 1.621                          | 0.9039 |
|                   | 1.5           | 10.04                   | 9.985                   | 2.398                   | 0.9538 | 11.35                   | 2.827                          | 0.8848 |

## 6. Adsorption and desorption kinetic curves of PPTPs on HPD-500 resin

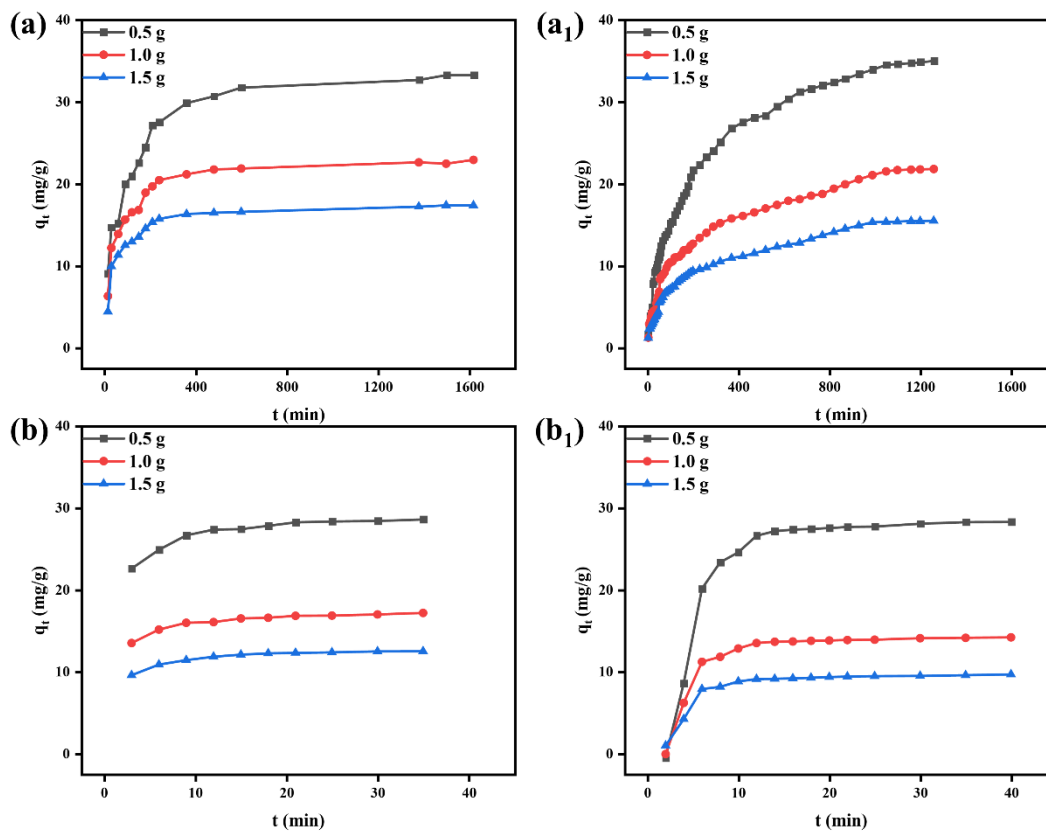

**Fig. S6** Adsorption and desorption kinetic curves of PPTPs on HPD-500 resin: (a-b). obtained by conventional spectrophotometric method; (a<sub>1</sub>-b<sub>1</sub>). obtained by FIA spectrophotometric method.

## 7. Adsorption/desorption kinetic models of PPTPs on HPD-500 resin

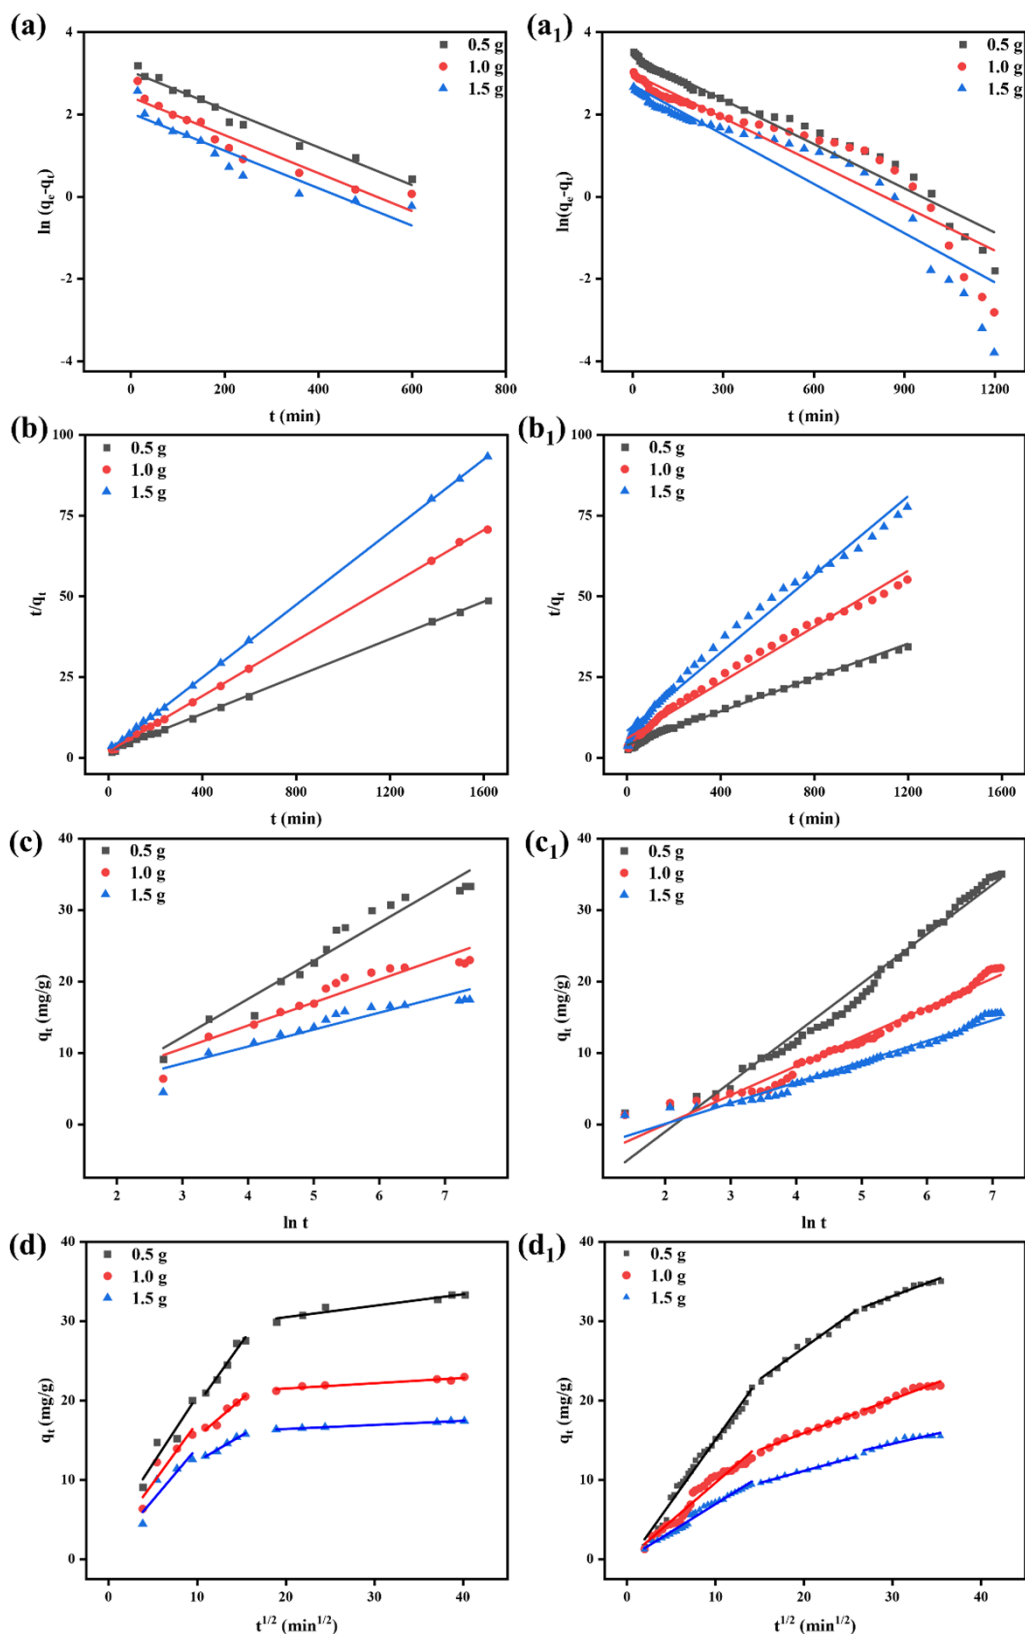

**Fig. S7** Linear fitting of the adsorption kinetics of PPTPs on HPD-500 resin: (a-a<sub>1</sub>). PFO model;

(b-b<sub>1</sub>). PSO model; (c-c<sub>1</sub>). Elovich model; (d-d<sub>1</sub>). IPD model.

**Table S7** Linear fitting parameters of adsorption kinetic models for PPTPs on HPD-500 resin.

| Detection methods | Adsorbent (g) | $q_{\text{exp}}$ (mg/g) | PFO                     |                           |        | PSO                     |                                   |        |
|-------------------|---------------|-------------------------|-------------------------|---------------------------|--------|-------------------------|-----------------------------------|--------|
|                   |               |                         | $q_{\text{cal}}$ (mg/g) | $k_1 \times 10^2$ (1/min) | $R^2$  | $q_{\text{cal}}$ (mg/g) | $k_2 \times 10^{-4}$ [g/(mg·min)] | $R^2$  |
| conventional      | 0.5           | 33.30                   | 20.96                   | 0.4612                    | 0.9684 | 34.52                   | 4.675                             | 0.9995 |
|                   | 1.0           | 22.94                   | 11.25                   | 0.4634                    | 0.9080 | 23.33                   | 10.54                             | 0.9997 |
|                   | 1.5           | 17.37                   | 7.591                   | 0.4562                    | 0.8670 | 17.76                   | 15.09                             | 0.9999 |
| FIA               | 0.5           | 35.04                   | 31.04                   | 0.3592                    | 0.9630 | 38.17                   | 1.865                             | 0.9952 |
|                   | 1.0           | 21.83                   | 19.94                   | 0.3598                    | 0.8889 | 23.10                   | 3.272                             | 0.9893 |
|                   | 1.5           | 15.49                   | 14.98                   | 0.4002                    | 0.8878 | 16.50                   | 4.573                             | 0.9875 |

**Table S8** IPD adsorption kinetic model parameters of PPTPs on HPD-500 resin.

| Detection methods | Adsorbent (g) | $K_{\text{id1}}$              | $R^2$  | $K_{\text{id2}}$              | $R^2$  | $K_{\text{id3}}$              | $R^2$  |
|-------------------|---------------|-------------------------------|--------|-------------------------------|--------|-------------------------------|--------|
|                   |               | [mg/(mL·min <sup>1/2</sup> )] |        | [mg/(mL·min <sup>1/2</sup> )] |        | [mg/(mL·min <sup>1/2</sup> )] |        |
| conventional      | 0.5           | 1.702                         | 0.8257 | 1.571                         | 0.9614 | 0.1442                        | 0.9137 |
|                   | 1.0           | 1.530                         | 0.8019 | 0.9494                        | 0.9293 | 0.06630                       | 0.9018 |
|                   | 1.5           | 1.322                         | 0.7425 | 0.6517                        | 0.9809 | 0.05100                       | 0.9957 |
| FIA               | 0.5           | 1.564                         | 0.9827 | 0.7947                        | 0.9799 | 0.4223                        | 0.9606 |
|                   | 1.0           | 0.961                         | 0.9576 | 0.4225                        | 0.9821 | 0.4176                        | 0.9252 |
|                   | 1.5           | 0.6940                        | 0.9785 | 0.3038                        | 0.9963 | 0.2539                        | 0.8582 |

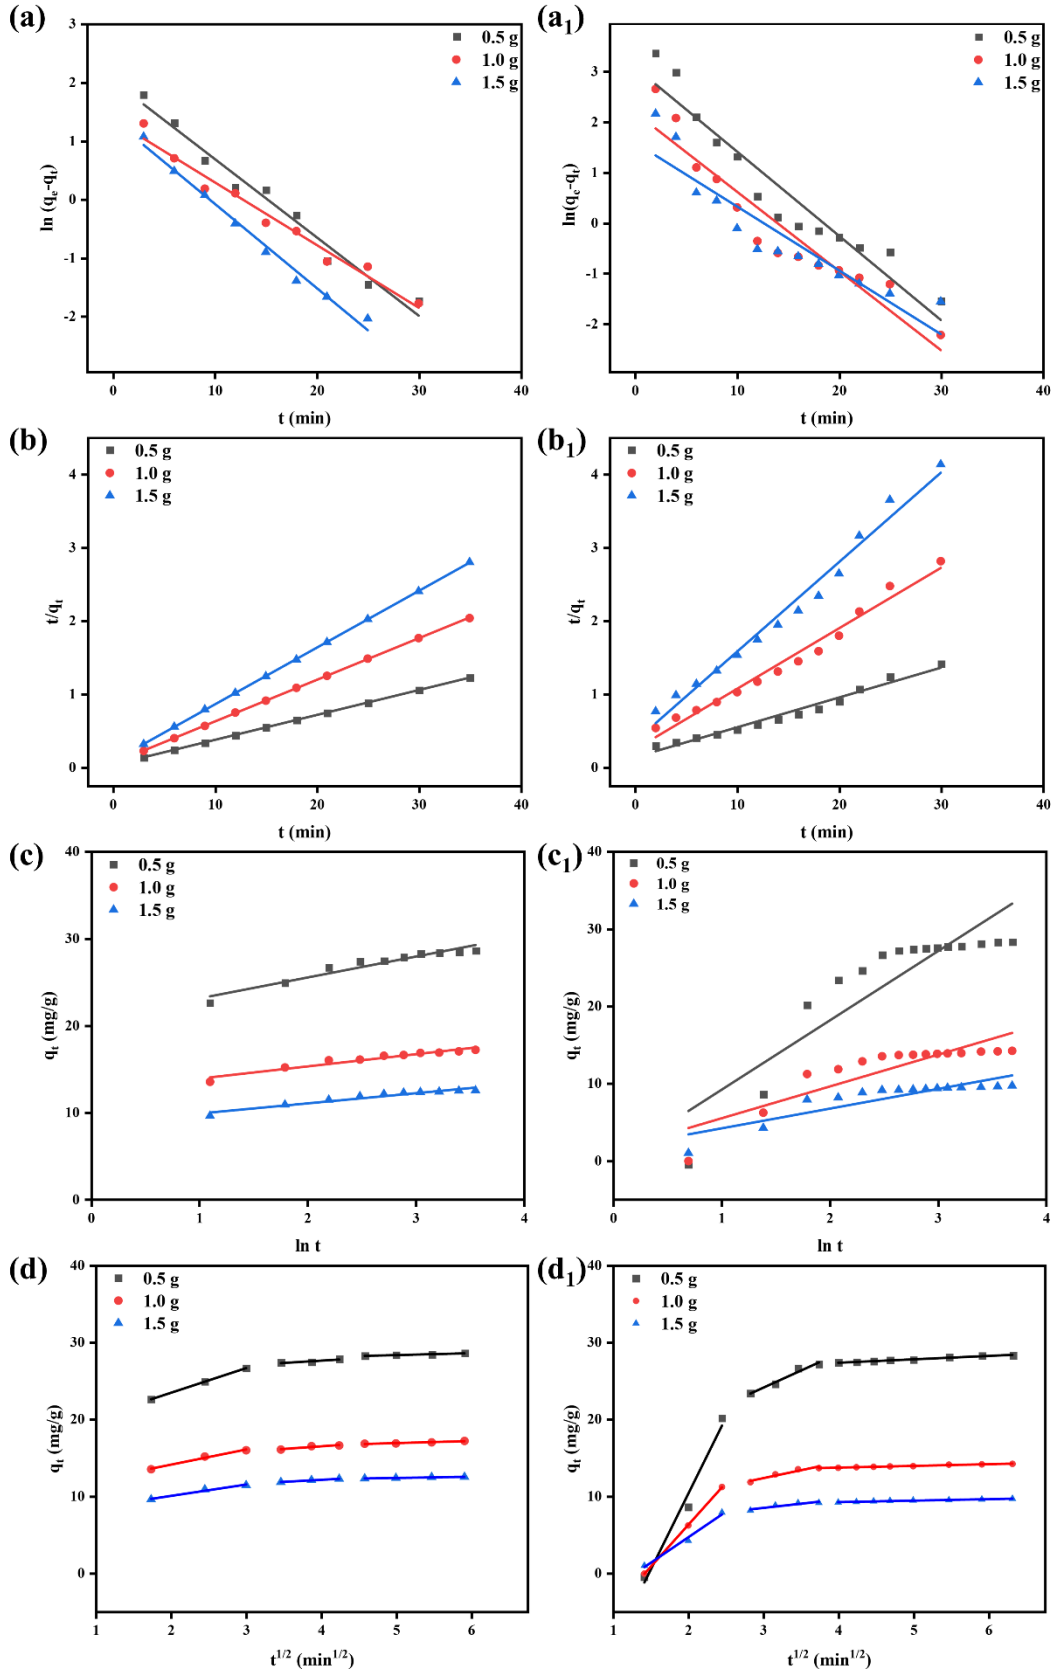

**Fig. S8** Linear fitting of the desorption kinetics of PPTPs on HPD-500 resin: (a-a<sub>1</sub>). PFO model;

(b-b<sub>1</sub>). PSO model; (c-c<sub>1</sub>). Elovich model; (d-d<sub>1</sub>). IPD model.

**Table S9** Linear fitting parameters of desorption kinetic models for PPTPs on HPD-500 resin.

| Detection methods | Adsorbent (g) | $q_{\text{exp}}$ (mg/g) | PFO                     |                         |        | PSO                     |                              |        |
|-------------------|---------------|-------------------------|-------------------------|-------------------------|--------|-------------------------|------------------------------|--------|
|                   |               |                         | $q_{\text{cal}}$ (mg/g) | $k_1 \times 10$ (1/min) | $R^2$  | $q_{\text{cal}}$ (mg/g) | $k_2 \times 10$ [g/(mg·min)] | $R^2$  |
| conventional      | 0.5           | 28.61                   | 7.592                   | 1.340                   | 0.9723 | 29.32                   | 0.3556                       | 0.9999 |
|                   | 1.0           | 17.19                   | 3.898                   | 1.072                   | 0.9692 | 17.60                   | 0.5721                       | 0.9991 |
|                   | 1.5           | 12.49                   | 3.901                   | 1.442                   | 0.9862 | 12.91                   | 0.7188                       | 0.9999 |
| FIA               | 0.5           | 28.31                   | 21.92                   | 1.672                   | 0.9110 | 24.55                   | 0.1217                       | 0.9723 |
|                   | 1.0           | 14.21                   | 8.923                   | 1.571                   | 0.8913 | 12.11                   | 0.2790                       | 0.9765 |
|                   | 1.5           | 9.669                   | 4.912                   | 1.267                   | 0.8406 | 8.179                   | 0.4201                       | 0.9787 |

**Table S10** IPD desorption kinetic model parameters of PPTPs on HPD-500 resin.

| Detection methods | Adsorbent (g) | $K_{\text{id1}}$              | $R^2$  | $K_{\text{id2}}$              | $R^2$  | $K_{\text{id3}}$              | $R^2$  |
|-------------------|---------------|-------------------------------|--------|-------------------------------|--------|-------------------------------|--------|
|                   |               | [mg/(mL·min <sup>1/2</sup> )] |        | [mg/(mL·min <sup>1/2</sup> )] |        | [mg/(mL·min <sup>1/2</sup> )] |        |
| conventional      | 0.5           | 3.201                         | 0.9999 | 0.5963                        | 0.6407 | 0.2489                        | 0.9368 |
|                   | 1.0           | 1.966                         | 0.9740 | 0.6870                        | 0.7797 | 0.2704                        | 0.9010 |
|                   | 1.5           | 1.471                         | 0.9533 | 0.5306                        | 0.9770 | 0.1581                        | 0.9179 |
| FIA               | 0.5           | 19.73                         | 0.9586 | 4.432                         | 0.9508 | 0.4424                        | 0.9723 |
|                   | 1.0           | 10.88                         | 0.9997 | 2.052                         | 0.8946 | 0.2229                        | 0.8078 |
|                   | 1.5           | 6.624                         | 0.9752 | 1.086                         | 0.8078 | 0.1908                        | 0.9586 |

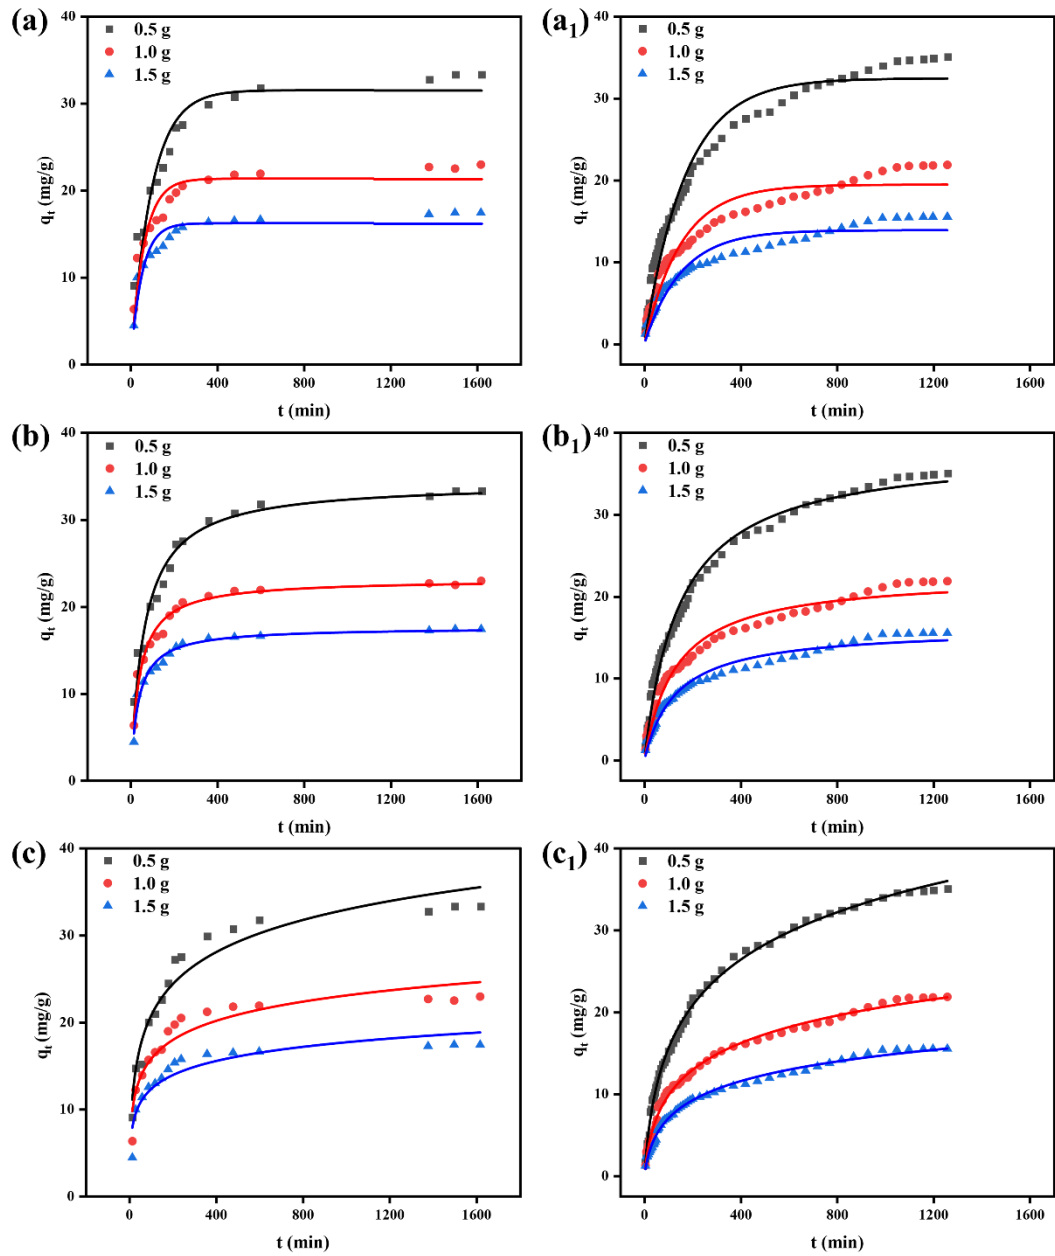

**Fig. S9** Nonlinear fitting of the adsorption kinetics of PPTPs on HPD-500 resin: (a-a<sub>1</sub>). PFO model; (b-b<sub>1</sub>). PSO model; (c-c<sub>1</sub>). Elovich model.



**Table S11** Nonlinear fitting parameters of adsorption kinetic models for PPTPs on HPD-500 resin.

| Detection methods | Adsorbent (g) | $q_{\text{exp}}$ (mg/g) | PFO                     |                           |        | PSO                     |                                   |        |
|-------------------|---------------|-------------------------|-------------------------|---------------------------|--------|-------------------------|-----------------------------------|--------|
|                   |               |                         | $q_{\text{cal}}$ (mg/g) | $k_1 \times 10^2$ (1/min) | $R^2$  | $q_{\text{cal}}$ (mg/g) | $k_2 \times 10^{-3}$ [g/(mg·min)] | $R^2$  |
| conventional      | 0.5           | 33.30                   | 31.50                   | 1.043                     | 0.8881 | 34.27                   | 4.750                             | 0.9611 |
|                   | 1.0           | 22.94                   | 21.32                   | 1.644                     | 0.8682 | 23.12                   | 11.2                              | 0.9698 |
|                   | 1.5           | 17.37                   | 16.19                   | 1.924                     | 0.8751 | 17.59                   | 16.7                              | 0.9667 |
| FIA               | 0.5           | 35.04                   | 32.41                   | 0.591                     | 0.9616 | 38.03                   | 1.78                              | 0.9882 |
|                   | 1.0           | 21.83                   | 19.42                   | 0.652                     | 0.9346 | 22.61                   | 3.78                              | 0.9752 |
|                   | 1.5           | 15.49                   | 13.84                   | 0.650                     | 0.9297 | 16.13                   | 4.71                              | 0.9729 |

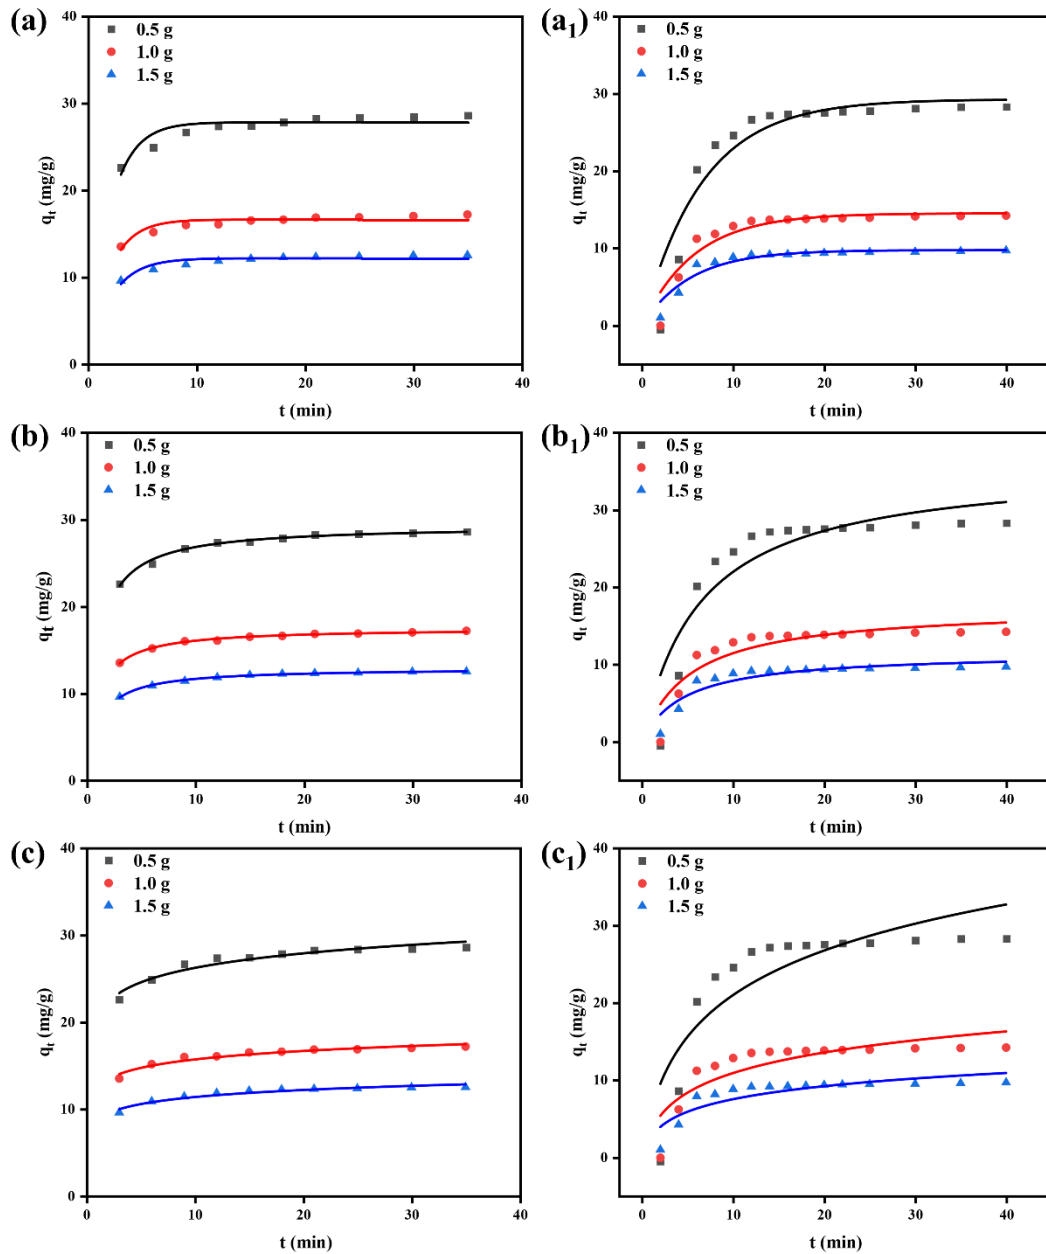

**Fig. S10** Nonlinear fitting of the desorption kinetics of PPTPs on HPD-500 resin: (a-a<sub>1</sub>). PFO model; (b-b<sub>1</sub>). PSO model; (c-c<sub>1</sub>). Elovich model.

**Table S12** Nonlinear fitting parameters of desorption kinetic models for PPTPs on HPD-500 resin.

| Detection methods | Adsorbent (g) | $q_{exp}$ (mg/g) | PFO              |                         |        | PSO              |                              |        |
|-------------------|---------------|------------------|------------------|-------------------------|--------|------------------|------------------------------|--------|
|                   |               |                  | $q_{cal}$ (mg/g) | $k_1 \times 10$ (1/min) | $R^2$  | $q_{cal}$ (mg/g) | $k_2 \times 10$ [g/(mg·min)] | $R^2$  |
| conventional      | 0.5           | 28.61            | 27.81            | 5.092                   | 0.8017 | 29.34            | 0.3650                       | 0.985  |
|                   | 1.0           | 17.19            | 16.61            | 5.208                   | 0.8207 | 17.50            | 0.6333                       | 0.9920 |
|                   | 1.5           | 12.49            | 12.15            | 4.7009                  | 0.8322 | 12.90            | 0.7230                       | 0.9955 |
| FIA               | 0.5           | 28.31            | 29.26            | 1.522                   | 0.8721 | 35.96            | 0.437                        | 0.8133 |
|                   | 1.0           | 14.21            | 14.49            | 1.748                   | 0.8690 | 17.41            | 0.1100                       | 0.8031 |
|                   | 1.5           | 9.669            | 9.727            | 1.884                   | 0.8969 | 11.52            | 0.1877                       | 0.8290 |

## 8. Reliability analysis

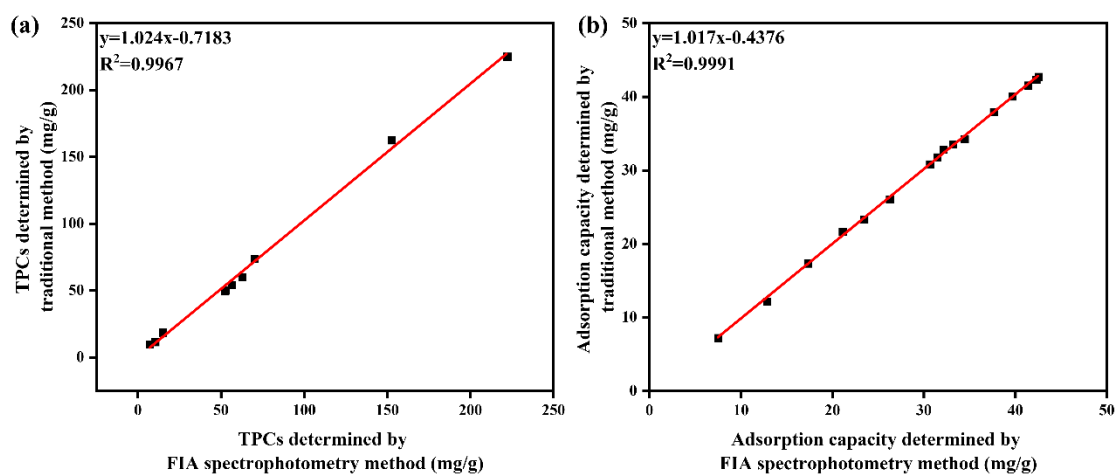

**Fig. S11** (a). Comparison of conventional and FIA spectrophotometric methods for the determination of plant TPCs (b) Linear fitting of conventional and FIA spectrophotometric methods for the adsorption capacities of SCTPs on HPD-500 resin.

**Table S13** Intraday (n = 10) and interday (n = 5) assays.

| Day | Absorbance |       |       |       |       |       |       |       |       |       | Average | RSD/% |
|-----|------------|-------|-------|-------|-------|-------|-------|-------|-------|-------|---------|-------|
|     | 1          | 2     | 3     | 4     | 5     | 6     | 7     | 8     | 9     | 10    |         |       |
| 1   | 0.522      | 0.520 | 0.523 | 0.524 | 0.527 | 0.520 | 0.517 | 0.520 | 0.527 | 0.525 | 0.523   | 0.6   |
| 2   | 0.523      | 0.523 | 0.523 | 0.519 | 0.519 | 0.518 | 0.524 | 0.518 | 0.519 | 0.522 | 0.521   | 0.5   |
| 3   | 0.521      | 0.535 | 0.532 | 0.534 | 0.526 | 0.528 | 0.526 | 0.530 | 0.535 | 0.523 | 0.529   | 0.9   |
| 4   | 0.538      | 0.535 | 0.539 | 0.541 | 0.532 | 0.523 | 0.530 | 0.526 | 0.521 | 0.524 | 0.531   | 1.4   |
| 5   | 0.525      | 0.517 | 0.520 | 0.521 | 0.526 | 0.529 | 0.518 | 0.522 | 0.520 | 0.531 | 0.523   | 0.9   |

## References

- 1 F. Gao, T. Muhammad, M. Bakri, P. Pataer and L. Chen, *ACS Omega*, 2018, **3**, 10891–10897.
- 2 T. Muhammad, O. Yimit, Y. Turahun, K. Muhammad, Y. Uludağ and Z. Zhao, *J. Sep. Sci.*, 2014, **37**, 1873–1879.
